# Supplementary material
Source: ML conference proceedings conference paper supplement (https://proceedings.neurips.cc/paper_files/paper/2015/hash/07563a3fe3bbe7e3ba84431ad9d055af-Abstract.html)
Supplement: Supplementary file [file 07563a3fe3bbe7e3ba84431ad9d055af-Supplemental.zip]

## Appendix of “Convolutional LSTM Network: A Machine Learning Approach for Precipitation Nowcasting”

Table 1: Best parameters for the optical flow estimator in ROVER.

| Parameter   | Meaning                                                         | Value |
|-------------|-----------------------------------------------------------------|-------|
| $L_{max}$   | Coarsest spatial scale level                                    | 6     |
| $L_{start}$ | Finest spatial scale level                                      | 0     |
| $n_{pre}$   | Number of pre-smoothing steps                                   | 2     |
| $n_{post}$  | Number of post-smoothing steps                                  | 2     |
| $\rho$      | Gaussian convolution parameter for local vector field smoothing | 1.5   |
| $\alpha$    | Regularization parameter in the energy function                 | 2000  |
| $\sigma$    | Gaussian convolution parameter for image smoothing              | 4.5   |

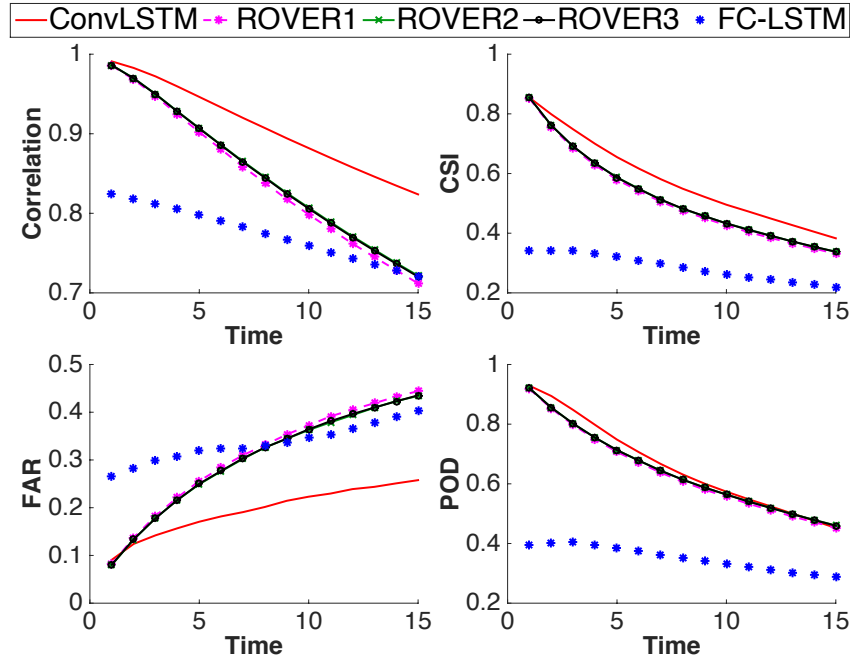

Figure 1: **(Larger Version)** Comparison of different models based on four precipitation nowcasting metrics over time.

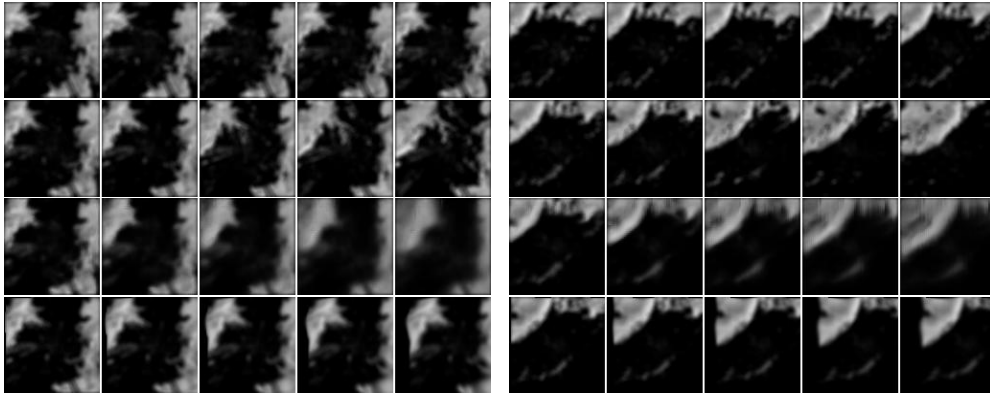

Figure 2: **(Larger Version)** Two prediction examples for the precipitation nowcasting problem. All the predictions and ground truths are sampled with an interval of 3. From top to bottom: input frames; ground truth; prediction by ConvLSTM network; prediction by ROVER2.

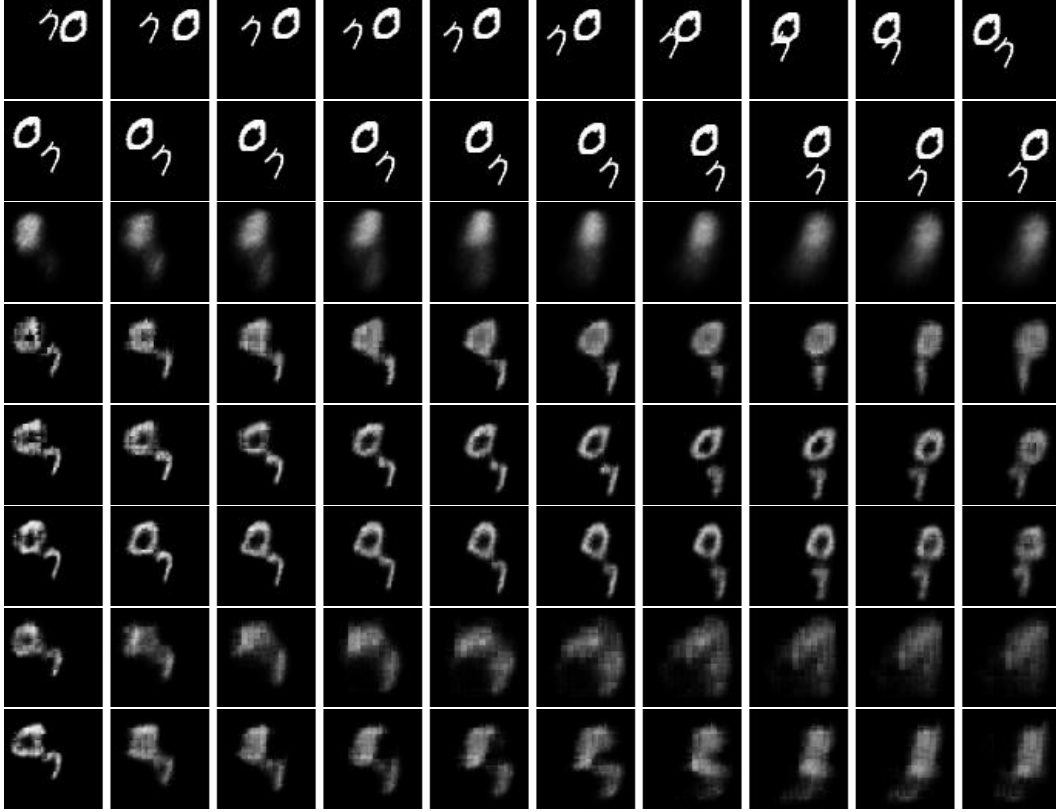

Figure 3: **An illustrative example showing the in-domain prediction results of different models.** From top to bottom: input frames; ground truth; FC-LSTM; ConvLSTM-5X5-5X5-1-layer; ConvLSTM-5X5-5X5-2-layer; ConvLSTM-5X5-5X5-3-layer; ConvLSTM-9X9-1X1-2-layer; ConvLSTM-9X9-1X1-3-layer.

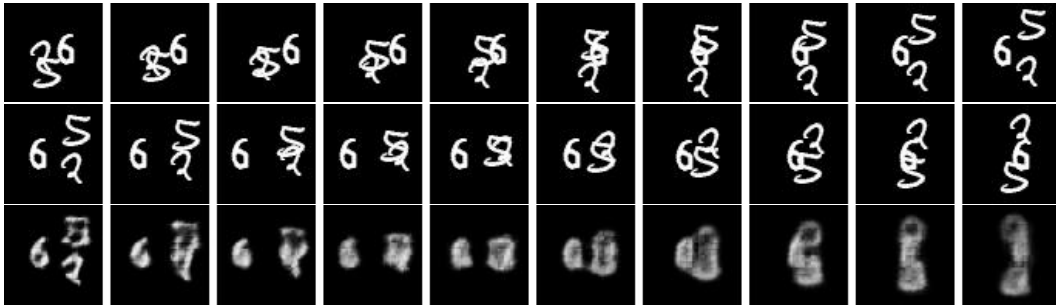

Figure 4: **(Larger Version) An illustrative example showing an out-domain run.** From top to bottom: input frames; ground truth; predictions of the 3-layer network.

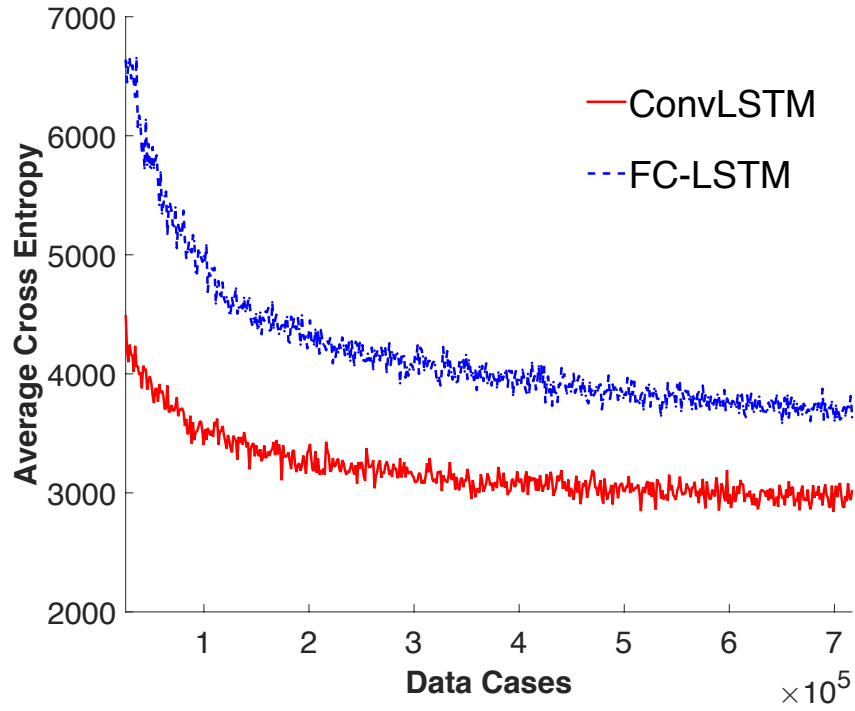

Figure 5: **Comparison of the 3-layer ConvLSTM and FC-LSTM in the online setting.** In each iteration, we generate a new set of training samples and record the average cross entropy of that mini-batch. The  $x$ -axis is the number of data cases (starting from 25600) and the  $y$ -axis is the average cross entropy of the mini-batches. We can find that the loss of ConvLSTM decreases faster than FC-LSTM.
